# Supplementary material for: Transcriptional Alterations by Ischaemic Postconditioning in a Pig Infarction Model: Impact on Microvascular Protection
Source: MDPI journal article supplement (doi:10.3390/ijms20020344), 2019-01-15
Supplement: s1 [file s1]

# **Transcriptional alterations by ischaemic postconditioning in a pig infarction model: impact on microvascular protection**

**Dominika Lukovic, Alfred Gugerell, Katrin Zlabinger, Johannes Winkler, Noemi Pavo,  
Tamás Baranyai, Zoltán Giricz, Zoltán V. Varga, Martin Riesenhuber, Andreas  
Spannbauer, Denise Traxler, András Jakab, Rita Garamvölgyi, Örs Petnehazy, Dietmar  
Pils, Levente Tóth, Rainer Schulz, Péter Ferdinandy, Mariann Gyöngyösi**

**Supplementary Information**

## Supplementary results

| Gene   | Name                                                      | 5' → 3' | Sequence              | GC [%] | Amplicon [bp] |
|--------|-----------------------------------------------------------|---------|-----------------------|--------|---------------|
| ITGB1  | Integrin $\beta$ -1                                       | forward | GGGACGTGTTGGGAGACATT  | 55     | 123           |
|        |                                                           | reverse | CCGCAGACACACTCTCCATT  | 55     |               |
| PTK2B  | Protein tyrosine kinase 2 $\beta$                         | forward | CAGCAGACGTTCCAGCAGTA  | 55     | 108           |
|        |                                                           | reverse | ACAGCGATAGGTCTCCTGGT  | 55     |               |
| SRC    | Non-receptor tyrosine kinase                              | forward | AATGCGGAGAACCCAAGAGG  | 55     | 80            |
|        |                                                           | reverse | TCGGACACAGAGAGGCAGTA  | 55     |               |
| PIK3CA | Phosphatidylinositol 3-Kinase, Catalytic Subunit $\alpha$ | forward | AAAGGCCGAAAGGGTGCTAA  | 50     | 127           |
|        |                                                           | reverse | ACCCATGAGGTACAGGCCAA  | 55     |               |
| AKT3   | V-Akt Murine Thymoma Viral Oncogene Homolog 3             | forward | TGATGAGGACGGAATGGACTG | 52     | 70            |
|        |                                                           | reverse | TGCAGAGTAGGAAAAGTGGG  | 50     |               |
| VCL    | Vinculin                                                  | forward | CGTCCGGGTTGGAAAAGAGA  | 55     | 130           |
|        |                                                           | reverse | TGACTGAAGCATCTGGGCTG  | 55     |               |
| RHOA   | Ras Homolog Family Member- A                              | forward | CCCAATGTGCCCATCATCCT  | 55     | 102           |
|        |                                                           | reverse | TGGTTTTACTGGCTCCTGCT  | 50     |               |
| ACTB   | Actin $\beta$                                             | forward | TCAACACCCCAGCCATGTAC  | 55     | 107           |
|        |                                                           | reverse | CTCCGGAGTCCATCACGATG  | 60     |               |
| PPIA   | Peptidylprolyl Isomerase A                                | forward | GTCTTCTTCGACATCGCCGT  | 55     | 120           |
|        |                                                           | reverse | TCCTTTCTCCCCAGTGCTCA  | 55     |               |
| HPRT1  | Hypoxanthine Phosphoribosyltransferase 1                  | forward | CCCAGCGTCGTGATTAGTGA  | 55     | 131           |
|        |                                                           | reverse | ATCTCGAGCAAGCCGTTTCAG | 55     |               |

**Supplementary Table 1. Primers used for qPCR**

| 3 hours        |            |         |                                    |      |    |        |           |
|----------------|------------|---------|------------------------------------|------|----|--------|-----------|
|                | group      | KEGG ID | Pathway                            | Size | z  | pG     | Status    |
| infarcted area | MI         | 4210    | Apoptosis                          | 46   | 16 | 0.0086 | Inhibited |
|                | IPostC     | 3320    | PPAR signaling pathway             | 31   | 9  | 0.0530 | Activated |
|                | MI +IPostC | 4020    | Calcium signaling pathway          | 70   | 17 | 0.0224 | Activated |
|                |            | 4270    | Vascular smooth muscle contraction | 51   | 13 | 0.0004 | Activated |
| remote area    | MI         | 4210    | Apoptosis                          | 46   | 13 | 0.0189 | Inhibited |
|                | MI +IPostC | 4270    | Vascular smooth muscle contraction | 36   | 20 | 0.0468 | Activated |
|                |            | 4020    | Calcium signaling pathway          | 70   | 27 | 0.0200 | Activated |

**Supplementary Table 2. Signaling Pathway Impact Analysis of DEGs in infarcted area of first window**

| 3 days         |             |         |                                           |                                                                                                                                                                  |                                                                                                                                                                  |     |          |           |           |
|----------------|-------------|---------|-------------------------------------------|------------------------------------------------------------------------------------------------------------------------------------------------------------------|------------------------------------------------------------------------------------------------------------------------------------------------------------------|-----|----------|-----------|-----------|
|                | group       | KEGG ID | Pathway                                   |                                                                                                                                                                  | Size                                                                                                                                                             | NDE | pG       | Status    |           |
| infarcted area | MI          | 4270    | Vascular smooth muscle contraction        |                                                                                                                                                                  | 51                                                                                                                                                               | 15  | 0.0034   | Activated |           |
|                | IPostC      | 4620    | Toll-like receptor signaling pathway      | A common denominator of induced immune processes was the upregulation of genes implicating defences against autologous cells undergoing various forms of stress. | 51                                                                                                                                                               | 25  | 0.0001   | Activated |           |
|                |             | 4650    | Natural killer cell mediated cytotoxicity |                                                                                                                                                                  | 47                                                                                                                                                               | 25  | 0.0002   | Activated |           |
|                |             | 4062    | Chemokine signaling pathway               |                                                                                                                                                                  | 80                                                                                                                                                               | 38  | 0.0006   | Activated |           |
|                |             | 4664    | Fc epsilon RI signaling pathway           |                                                                                                                                                                  | 25                                                                                                                                                               | 13  | 0.0017   | Activated |           |
|                |             | 4666    | Fc gamma R-mediated phagocytosis          |                                                                                                                                                                  | 43                                                                                                                                                               | 20  | 0.0017   | Activated |           |
|                |             | 4670    | Leukocyte transendothelial migration      |                                                                                                                                                                  | 60                                                                                                                                                               | 25  | 0.0037   | Activated |           |
|                |             | 4662    | B cell receptor signaling pathway         |                                                                                                                                                                  | 30                                                                                                                                                               | 18  | 0.0259   | Activated |           |
|                |             | 4014    | Ras signaling pathway                     |                                                                                                                                                                  | 105                                                                                                                                                              | 47  | 0.0287   | Activated |           |
|                |             | 4810    | Regulation of actin cytoskeleton          |                                                                                                                                                                  | 88                                                                                                                                                               | 35  | 0.0395   | Activated |           |
|                |             | 3320    | PPAR signaling pathway                    |                                                                                                                                                                  | 31                                                                                                                                                               | 9   | 0.0530   | Activated |           |
|                | remote area | MI      | 4650                                      | Natural killer cell mediated cytotoxicity                                                                                                                        | A common denominator of induced immune processes was the upregulation of genes implicating defences against autologous cells undergoing various forms of stress. | 47  | 37       | 2.51E-06  | Activated |
|                |             |         | 4670                                      | Leukocyte transendothelial migration                                                                                                                             |                                                                                                                                                                  | 60  | 44       | 1.11E-05  | Activated |
| 4664           |             |         | Fc epsilon RI signaling pathway           | 25                                                                                                                                                               |                                                                                                                                                                  | 20  | 5.07E-04 | Activated |           |
| 4620           |             |         | Toll-like receptor signaling pathway      | 51                                                                                                                                                               |                                                                                                                                                                  | 32  | 0.0010   | Activated |           |
| 4062           |             |         | Chemokine signaling pathway               | 80                                                                                                                                                               |                                                                                                                                                                  | 53  | 0.0031   | Activated |           |
| 5010           |             |         | Mitochondrial dysfunction                 |                                                                                                                                                                  |                                                                                                                                                                  | 108 | 90       | 0.0046    | Activated |
| 5414           |             |         | Dilated cardiomyopathy                    |                                                                                                                                                                  |                                                                                                                                                                  | 47  | 36       | 0.0365    | Inhibited |
| 4066           |             |         | HIF-1 signaling pathway                   |                                                                                                                                                                  |                                                                                                                                                                  | 55  | 43       | 0.0481    | Activated |
| IPostC         |             | 4270    | Vascular smooth muscle contraction        |                                                                                                                                                                  | 51                                                                                                                                                               | 20  | 0.0066   | Activated |           |

**Supplementary Table 3. Signaling Pathway Impact Analysis of DEGs in infarcted area of first window**

Differentially expressed genes, DEG; Kyoto encyclopedia of genes and genomes (KEGG) pathway ID, KEGG ID; number of differentially expressed genes, NDE; global p-value, pG

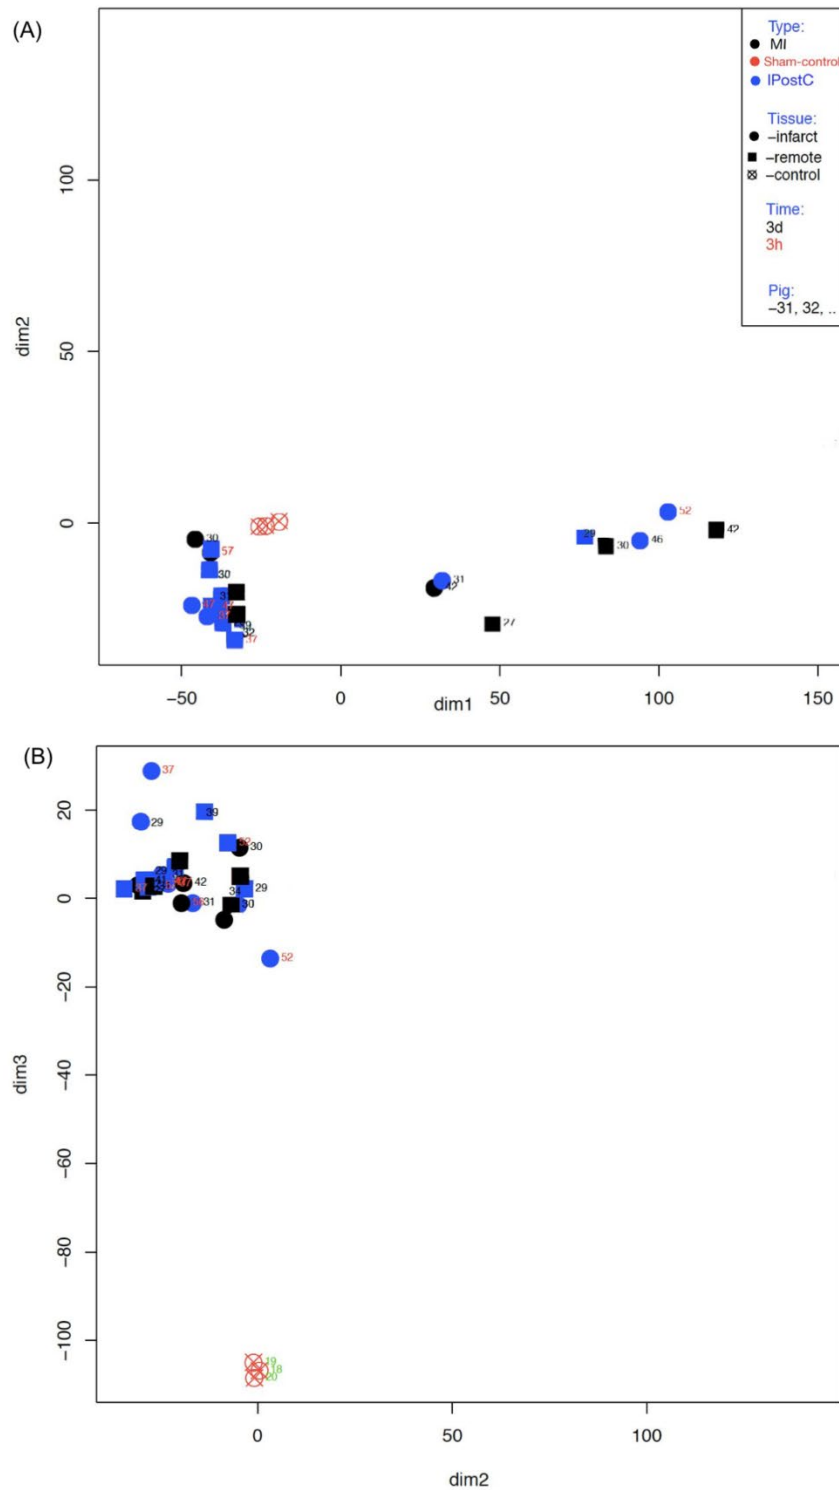

**Supplementary Figure 1. Global (Principal component analysis, PCA).**

The first (dim1) and the second (dim2) dimensions of the PCA **(A)**, the second (dim2) and the third (dim3) dimensions of the PCA **(B)**

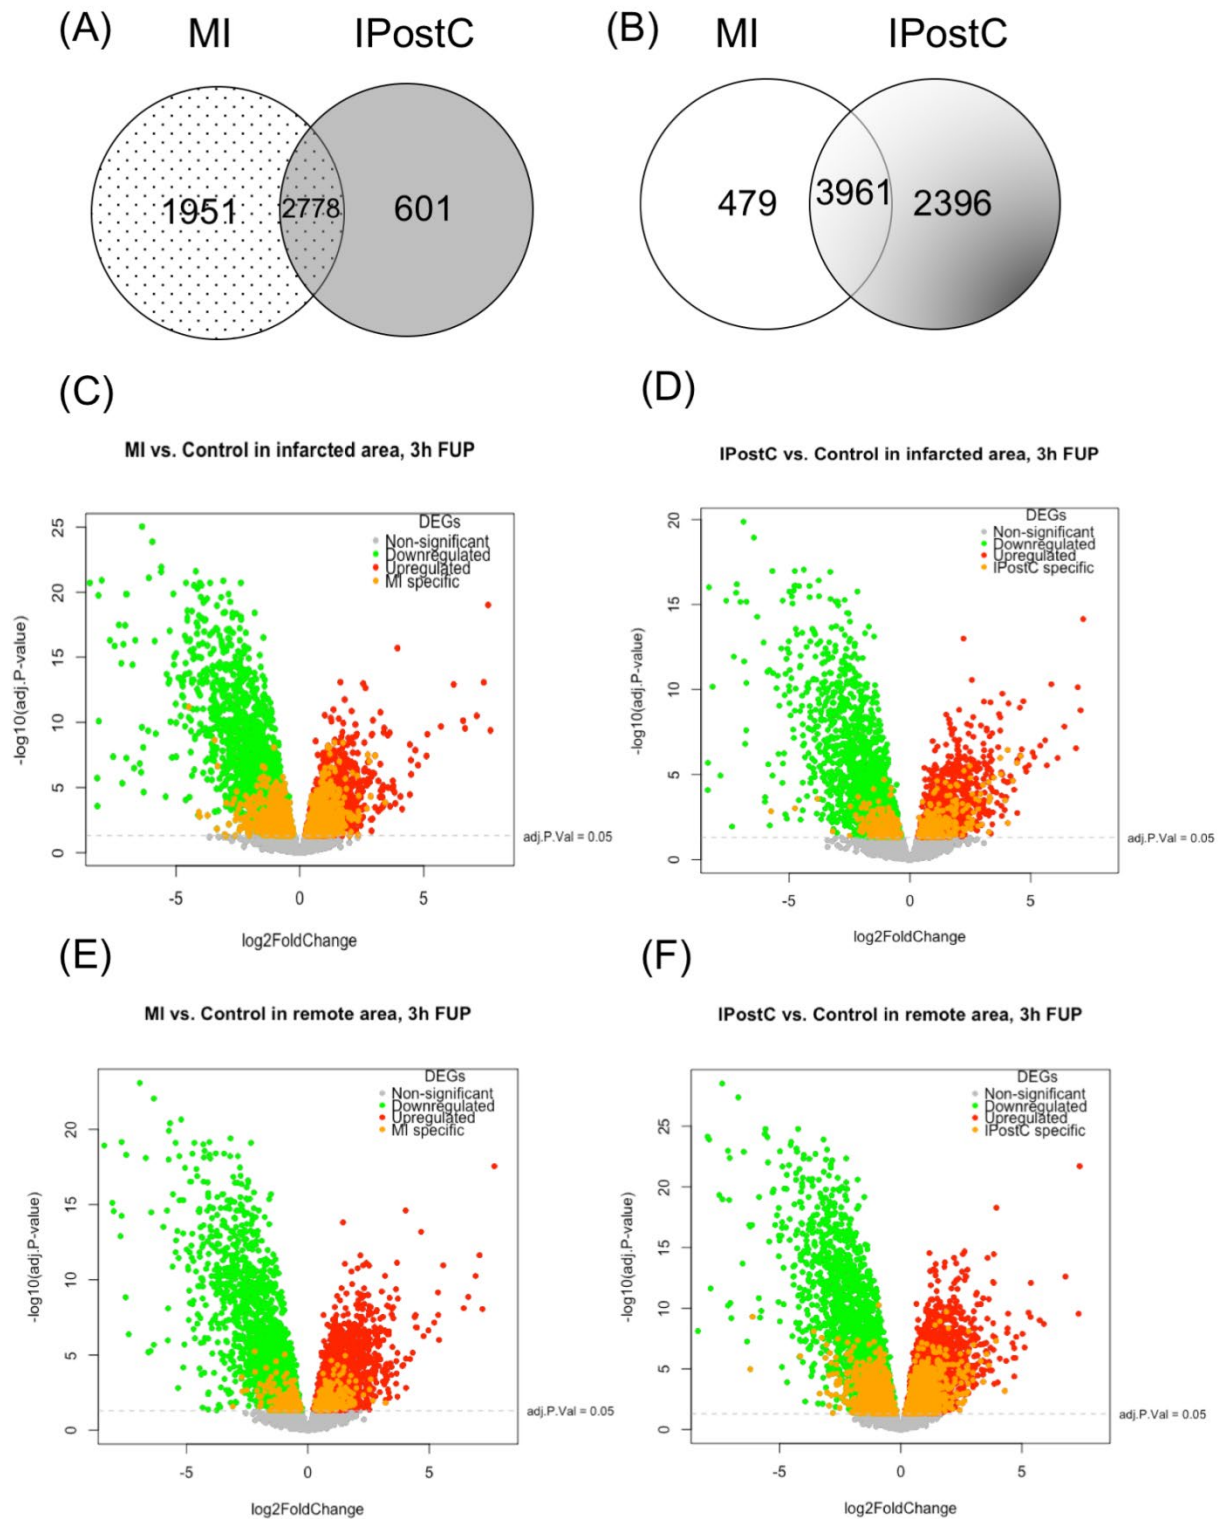

**Supplementary Figure 2 Analysis of differentially expressed genes (DEGs) of infarcted area and remote area in the first window**

(A) Venn diagram showing the comparison of differentially regulated genes between myocardial infarction (MI, n=3) and ischemic postconditioning (IPostC, n=3) group in infarcted area at three hours follow-up.

- (B) Venn diagram showing the comparison of differentially regulated genes between myocardial infarction (MI, n=3) and ischemic postconditioning (IPostC, n=3) group in remote area at three hours follow-up.
- (C) Volcano plot for DEGs in infarcted area of MI group (n=3) after three hours follow-up compared to the control group.
- (D) Volcano plot for DEGs in infarcted area of IPostC group (n=3) after three hours follow-up compared to the control group.
- (E) Volcano plot for DEGs in remote area of MI group (n=3) after three hours follow-up compared to the control group.
- (F) Volcano plot for DEGs in remote area of IPostC group (n=3) after three hours follow-up compared to the control group.

*Volcano plot reporting adjusted P-value [ $-\log_{10}(\text{adj. P. Val.})$ , y axis] as a function of  $\log_2$  (fold change). Each point represents an individual transcript.*

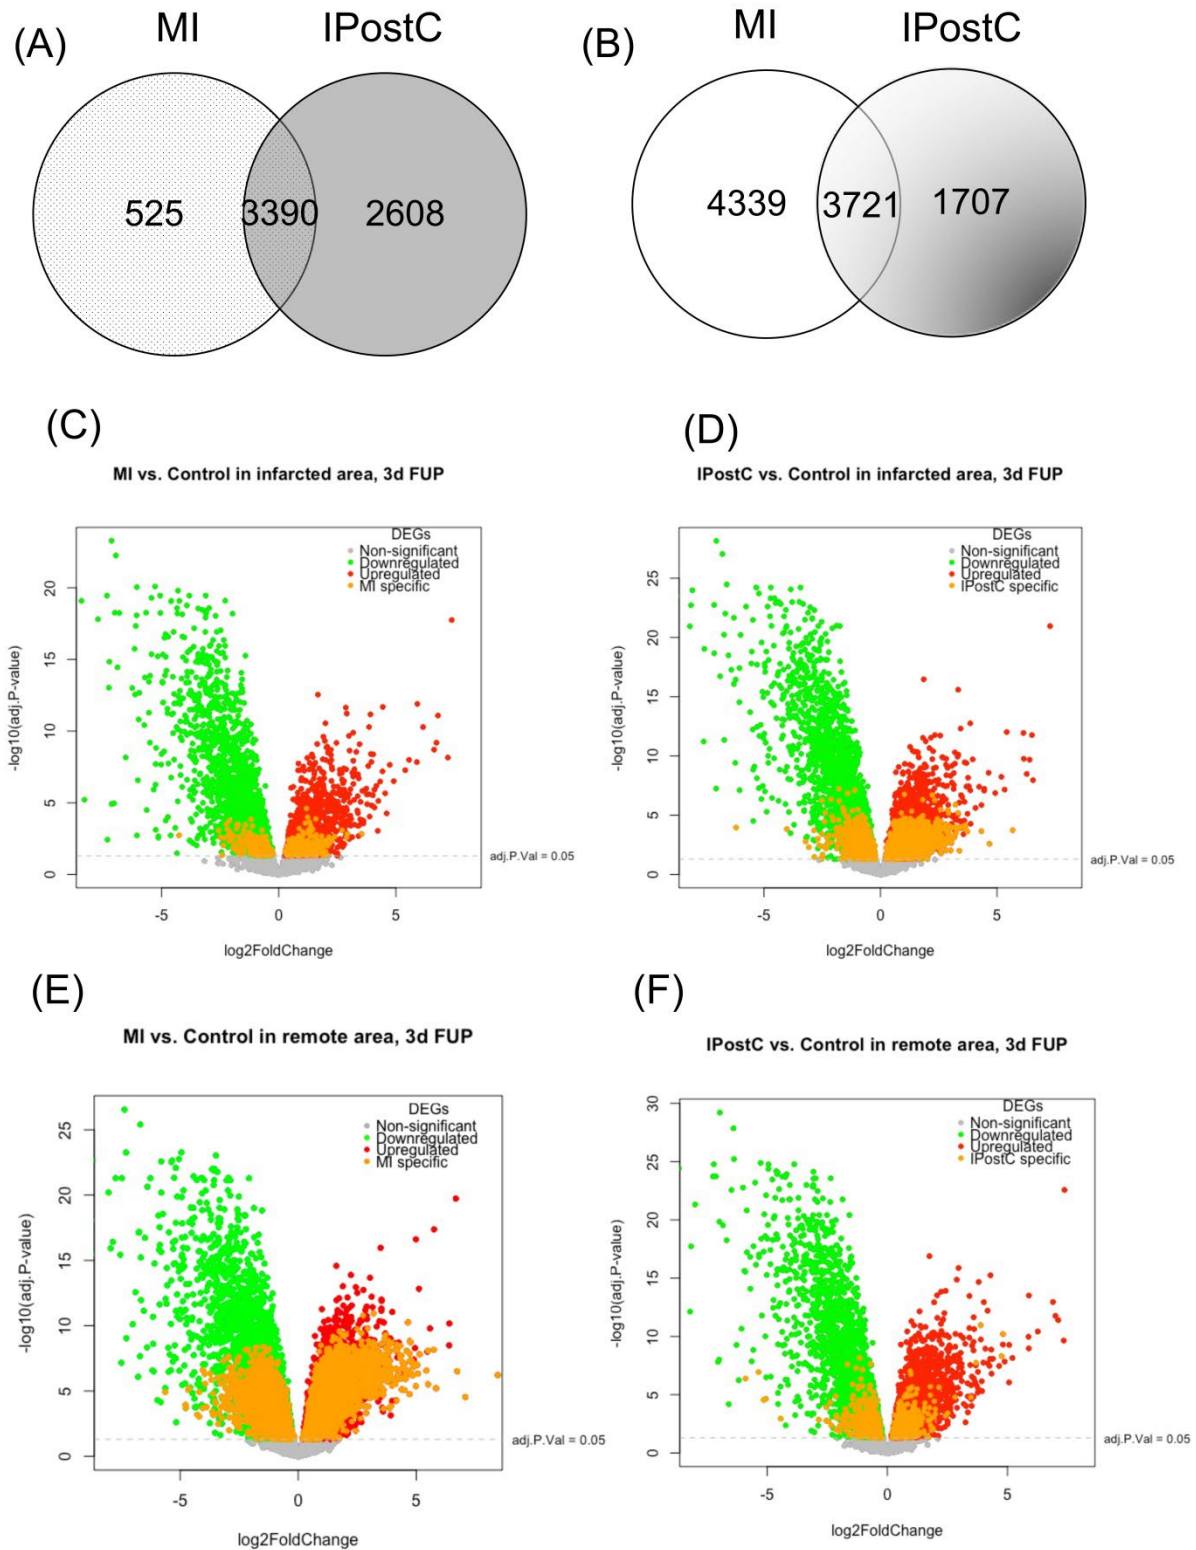

**Supplementary Figure 3 Analysis of differentially expressed genes (DEGs) of infarcted area and remote area in the second window**

(A) Venn diagram showing the comparison of differentially regulated genes between myocardial infarction (MI, n=3) and ischemic postconditioning (IPostC, n=3) group in infarcted area at three days follow-up.



- (B) Venn diagram showing the comparison of differentially regulated genes between myocardial infarction (MI, n=3) and ischemic postconditioning (IPostC, n=3) group in remote area at three days follow-up.
- (C) Volcano plot for DEGs in infarcted area of MI group (n=3) after three days follow-up compared to the control group.
- (D) Volcano plot for DEGs in infarcted area of IPostC group (n=3) after three days follow-up compared to the control group.
- (E) Volcano plot for DEGs in remote area of MI group (n=3) after three days follow-up compared to the control group.
- (F) Volcano plot for DEGs in remote area of IPostC group (n=3) after three days follow-up compared to the control group.

*Volcano plot reporting adjusted P-value [ $-\log_{10}(\text{adj. } P. \text{ Val, y axis})$ ] as a function of  $\log_2$  (fold change). Each point represents an individual transcript.*

## Supplementary methods

### Bioinformatic analysis

Analysis of samples was performed on the HiSeq2500 platform with a depth of 15-20 million paired-end reads per samples. Quality control and demultiplexing of reads was assessed by FastQC. Alignment to *Sus scrofa* genome (Sscrofa 10.2) was performed applying RNA-Seq Unified Mapper (v2.0.4) <sup>1</sup>.

HTSeq software was used to count reads into *Sus scrofa* gene model <sup>2</sup>.

Downstream analysis and statistical calculations were performed on R Studio platform (version 3.2.3).

EdgeR package was utilised to identify differentially expressed genes (DEGs) and read count values were normalised and trimmed to remove genes with a low expression. Differently expressed genes were considered statistically significant at the threshold of  $FDR < 0.05$ . Moderated t-statistics, F-statistics, and the log odds of differential expression were computed by empirical Bayes shrinkage of the standard errors towards a common value. False discovery rate (FDR) below 5% was accounted as statistically significant. FDR cut-off of 10% was considered for some contrasts, for relevant gene lists for biomedical interpretation. Unsupervised hierarchical cluster analysis was performed using the Euclidean distance as the distance function and the Ward algorithm in R, using centred and scaled log2 expression values. Principal Component Analysis (PCA) was conducted for centred and scaled values.

Genes with significant differential expression were annotated according to the function and subjected to signalling pathway impact analysis (SPIA) <sup>3</sup>. Deregulation of the single gene was represented by the log<sub>2</sub> fold changes. Family-wise error rate (FWER) correction and false discovery rate (FDR) correction were applied to determine the regulation of genes and pathway topology with a cut-off of 5 %.

Gene Enrichment Profiler Database <sup>4</sup> and Protein Atlas Database <sup>5</sup> were used to identify genes with high enrichment score for specific cell types present in cardiac tissue. Protein networks were constructed using the R package dnet <sup>6</sup>, based on protein-protein interactions supplied by the String database, version 10 <sup>7</sup>. Nodes shown were restricted to a maximum of 50.

## Supplementary References

1. Grant GR, Farkas MH, Pizarro AD, Lahens NF, Schug J, Brunk BP, Stoeckert CJ, Hogenesch JB, Pierce EA. Comparative analysis of RNA-Seq alignment algorithms and the RNA-Seq unified mapper (RUM). *Bioinformatics* 2011;**27**:2518-2528.
2. Anders S, Pyl PT, Huber W. HTSeq--a Python framework to work with high-throughput sequencing data. *Bioinformatics* 2015;**31**:166-169.
3. Tarca AL, Draghici S, Khatri P, Hassan SS, Mittal P, Kim JS, Kim CJ, Kusanovic JP, Romero R. A novel signaling pathway impact analysis. *Bioinformatics* 2009;**25**:75-82.
4. Benita Y, Cao Z, Giallourakis C, Li C, Gardet A, Xavier RJ. Gene enrichment profiles reveal T-cell development, differentiation, and lineage-specific transcription factors including ZBTB25 as a novel NF-AT repressor. *Blood* 2010;**115**:5376-5384.
5. Uhlen M, Fagerberg L, Hallstrom BM, Lindskog C, Oksvold P, Mardinoglu A, Sivertsson A, Kampf C, Sjostedt E, Asplund A, Olsson I, Edlund K, Lundberg E, Navani S, Szigartyo CA, Odeberg J, Djureinovic D, Takanen JO, Hober S, Alm T, Edqvist PH, Berling H, Tegel H, Mulder J, Rockberg J, Nilsson P, Schwenk JM, Hamsten M, von Feilitzen K, Forsberg M, Persson L, Johansson F, Zwahlen M, von Heijne G, Nielsen J, Ponten F. Proteomics. Tissue-based map of the human proteome. *Science* 2015;**347**:1260419.
6. Fang H, Gough J. The 'dnet' approach promotes emerging research on cancer patient survival. *Genome Medicine* 2014;**6**:64.
7. Szklarczyk D, Franceschini A, Wyder S, Forslund K, Heller D, Huerta-Cepas J, Simonovic M, Roth A, Santos A, Tsafou KP, Kuhn M, Bork P, Jensen LJ, von Mering C. STRING v10: protein-protein interaction networks, integrated over the tree of life. *Nucleic Acids Res* 2015;**43**:D447-D452.
