# Supplementary material for: Transcriptional Alterations by Ischaemic Postconditioning in a Pig Infarction Model: Impact on Microvascular Protection
Source: Int J Mol Sci. 2019 Jan 15;20(2):344. doi: 10.3390/ijms20020344 (PMC6358966; doi:10.3390/ijms20020344)
Supplement: Supplementary file 1 [file ijms-20-00344-s001.zip › Supplementary Table 4.xlsx]

## Sheet: Tabelle1
Genes involved in cardioprotection_Figure 3
Ensembl ID	Gene Name	MI_infarcted_3h-logFC	MI_infarcted_3h-P.Val	IPOSTC_infarcted_3h-logFC	IPOSTC_infarcted_3h-P.Val	MI_infarcted_3d-logFC	MI_infarcted_3d-P.Val	IPOSTC_infarcted_3d-logFC	IPOSTC_infarcted_3d-P.Val	MI_remote_3h-logFC	MI_remote_3h-P.Val	IPOSTC_remote_3h-logFC	IPOSTC_remote_3h-P.Val	MI_remote_3d-logFC	MI_remote_3d-P.Val	IPOSTC_remote_3d-logFC	IPOSTC_remote_3d-P.Val
ENSSSCG00000010054	ADORA2A	0.186904	0.579698	-0.205202	0.702293	0.158999	0.696593	-0.215323	0.439832	-0.225261	0.571305	-0.414007	0.12094	-0.912951	0.00245517	0.134894	0.632761
ENSSSCG00000006788	ADORA3	1.33088	0.0947834	1.83433	0.060518	1.97906	0.0143266	1.64233	0.0132937	2.46003	0.00128024	2.8658	7.85e-06	3.24372	9.86e-07	1.39501	0.0357208
ENSSSCG00000010647	ADRB1	-0.730099	0.172664	-0.148304	0.8734	-0.506954	0.42121	-1.08321	0.0165734	-0.633566	0.294603	-0.687134	0.1094	-2.61841	9.82e-06	-0.309073	0.498106
ENSSSCG00000003194	AKT1S1	0.0489303	0.851586	0.0924225	0.803806	-0.0457487	0.881387	-0.482236	0.00828279	0.224475	0.373185	0.157906	0.382877	-0.673718	0.000304	0.0723133	0.715158
ENSSSCG00000002989	AKT2	-1.08921	6.83e-11	-0.899668	2.13e-06	-0.971244	5.7e-09	-0.978881	4.66e-11	-1.08841	6.42e-10	-1.00593	8.5e-12	-0.864788	1.25e-09	-0.930221	2.71e-11
ENSSSCG00000003088	APOE	-1.41125	0.412328	-0.236763	0.927613	-0.196971	0.925587	2.56935	0.0110263	-0.35387	0.853017	-1.34872	0.303845	4.71443	1.75e-05	-0.56779	0.667877
ENSSSCG00000009397	CAB39L	0.610725	0.000365	0.312828	0.200579	0.282259	0.157477	0.273117	0.06415	0.282707	0.148674	0.361445	0.011285	0.0906458	0.559927	0.119374	0.445691
ENSSSCG00000024816	CEBPB	-5.01108	3.86e-12	-4.83219	2.33e-08	-5.74188	3.81e-11	-6.05706	2.9e-15	-4.51855	2.67e-10	-4.05164	1.04e-13	-4.70433	5.24e-13	-5.91255	2.78e-16
ENSSSCG00000014441	CSF1R	-2.7245	2.04e-05	-2.9621	0.000616	-2.08128	0.00107228	-0.751126	0.0830154	-1.95678	0.00157453	-1.98295	3.79e-05	0.620742	0.131699	-2.23828	6.13e-06
ENSSSCG00000005998	DEPTOR	0.69324	0.0148951	0.890275	0.0152116	1.35676	8.27e-06	1.29748	5.04e-07	1.18136	9.79e-05	1.0322	2.7e-05	1.91522	5.22e-11	1.17361	2.13e-06
ENSSSCG00000027525	DHCR24	-2.33928	2.19e-08	-3.36415	2.01e-09	-2.91855	4.4e-10	-3.71461	3.8e-15	-2.12718	1e-06	-2.67573	1.59e-11	-3.26986	3.67e-13	-2.88941	7.91e-13
ENSSSCG00000022126	EGFR	0.234193	0.636007	0.955512	0.0750142	1.15503	0.00738265	1.20303	0.000522	1.0907	0.0111439	1.02357	0.00244599	0.980905	0.00521736	1.21034	0.00034
ENSSSCG00000021278	EIF4B	-0.607303	0.0127637	-1.22931	0.000208	-1.38828	1.56e-06	-1.60744	6.38e-10	-0.672081	0.0119045	-0.550131	0.00667722	-1.74861	3.14e-10	-1.3594	7.56e-09
ENSSSCG00000011516	EIF4E3	-0.629834	0.00222666	-0.631654	0.0231737	-0.668139	0.00359456	-1.05351	2.01e-07	-0.752792	0.00112495	-0.674251	0.000125	-1.03382	7.93e-07	-0.429448	0.00924799
ENSSSCG00000010268	EIF4EBP2	0.95145	0.00279056	0.805505	0.0609928	0.744431	0.0356618	0.630177	0.0227283	1.25053	0.000314	0.863401	0.0013427	-0.324418	0.283587	0.941003	0.000446
ENSSSCG00000020672	F2R	0.0967693	0.745803	-0.425599	0.240731	0.486516	0.0847248	0.406527	0.0628429	0.0547975	0.874435	0.0829941	0.718095	0.41169	0.0479362	0.0874123	0.712005
ENSSSCG00000013905	FKBP8	-0.447739	0.00122095	-0.256359	0.184378	-0.416091	0.00480317	-0.394264	0.0011393	-0.368468	0.0141598	-0.480209	5.35e-05	-0.0912364	0.431259	-0.40393	0.000388
ENSSSCG00000011125	GATA3	-0.394512	0.409978	-0.124069	0.876149	0.0697322	0.912131	-0.235955	0.544592	0.319198	0.527166	0.581483	0.0791625	-0.0596754	0.880029	-0.143474	0.72384
ENSSSCG00000007864	GPRC5B	-0.88751	0.000182	-0.900609	0.00297796	-0.734513	0.00335754	-0.909213	2.03e-05	-0.74106	0.00345936	-0.64262	0.00106342	-0.503297	0.0091871	-0.942999	3.14e-06
ENSSSCG00000022590	GPRC5C	-1.03617	0.000962	-1.04501	0.0130086	-0.648926	0.0539156	-1.08459	8.81e-05	-0.913489	0.00703576	-1.39898	1.39e-06	-1.67172	4e-07	-0.904891	0.000397
ENSSSCG00000017092	GPX3	-3.58741	5.1e-07	-2.70933	0.00163696	-3.23346	1.01e-05	-2.52981	4.4e-05	-3.16609	2.05e-05	-2.73451	6e-06	-1.50056	0.00921032	-3.49272	2.31e-08
ENSSSCG00000011889	GSK3B	1.14347	6.52e-09	1.49987	3.07e-09	1.21716	7.28e-09	1.26729	1.68e-11	1.38859	3.57e-10	1.23162	1.97e-11	1.27289	3.66e-11	1.33941	6.98e-13
ENSSSCG00000015844	GSR	-1.15199	1.41e-05	-1.49429	5.04e-05	-0.92097	0.000866	-0.733259	0.000448	-1.46701	2.67e-06	-1.32208	4.47e-08	-0.161421	0.413329	-0.919956	1.25e-05
ENSSSCG00000007287	GSS	-0.8232	0.00589213	-0.0164523	0.974684	-0.788114	0.0184668	-0.549198	0.0244221	-0.597365	0.0676669	0.048242	0.852554	-0.226055	0.353289	-0.529671	0.0255912
ENSSSCG00000002396	GSTZ1	0.175646	0.549372	0.174689	0.689784	-0.10662	0.769093	-0.615842	0.00795274	-0.0118037	0.974231	0.146156	0.525678	-1.34913	1.08e-06	0.0247057	0.92654
ENSSSCG00000008261	HK2	3.35664	0.00029	4.92827	2.93e-06	4.08008	2.14e-05	4.07358	2.39e-06	3.92466	4.55e-05	5.02727	1.3e-08	4.89361	3.89e-08	3.28068	9.3e-05
ENSSSCG00000001526	HMGA1	0.508095	0.0947223	0.262414	0.586009	-0.0834207	0.851625	0.534034	0.0375132	0.531774	0.113231	0.251548	0.328463	0.951947	0.000238	-0.00579986	0.985735
ENSSSCG00000026201	IFNAR2	0.642505	0.11401	0.516563	0.39159	0.617948	0.186176	1.21556	0.000304	0.106155	0.855198	0.253811	0.485287	1.84114	2.51e-07	0.695777	0.0366819
ENSSSCG00000015085	IL10RA	-0.252602	0.670581	-0.70876	0.385445	0.498209	0.402697	1.35895	0.00121032	0.00387947	0.995458	-0.0140606	0.977699	2.487	1.13e-07	0.732579	0.0680736
ENSSSCG00000012397	IL2RG	-0.130217	0.852688	-0.0300112	0.977242	0.605415	0.339411	1.29837	0.00235283	0.500428	0.432896	-0.219005	0.671518	2.31264	2.7e-07	0.32411	0.507117
ENSSSCG00000007817	IL4R	0.102569	0.806717	0.732316	0.119889	0.621398	0.105643	0.797008	0.00703289	0.54725	0.157288	0.287669	0.324676	1.57958	9.09e-07	0.484725	0.0875871
ENSSSCG00000016916	IL6ST	0.880989	0.00150292	0.975821	0.0073781	1.3611	1.21e-05	1.01387	5.31e-05	1.60951	1.18e-06	1.08318	9.41e-06	0.826054	0.000462	1.25345	3.74e-07
ENSSSCG00000013564	INSR	1.1179	0.0102471	1.52558	0.0098651	1.11819	0.0176045	0.976593	0.00892565	1.37085	0.00446578	2.00976	8.3e-07	-0.122119	0.735532	1.21349	0.000651
ENSSSCG00000003809	JAK1	0.540759	0.00370689	0.622458	0.0108382	0.684536	0.000753	0.808621	2.68e-06	0.841566	4.76e-05	0.679992	2.84e-05	0.892413	4.67e-07	0.394001	0.0112897
ENSSSCG00000005215	JAK2	-0.0206144	0.959546	-0.482938	0.322921	0.21861	0.577302	0.654756	0.00887205	-0.00629025	0.989621	0.111587	0.686915	1.19464	5.62e-06	-0.0167653	0.958531
ENSSSCG00000013888	JAK3	-0.431504	0.545242	-0.229359	0.839634	0.717176	0.288355	1.60237	0.000694	0.107262	0.897783	0.357145	0.485185	2.98272	1.41e-08	0.0123295	0.984731
ENSSSCG00000013735	JUNB	0.229708	0.81314	0.908127	0.422446	-0.138373	0.913859	1.3748	0.0315642	0.413696	0.688614	1.92135	0.00186038	2.60264	5.4e-05	-0.145719	0.861621
ENSSSCG00000010081	MAPK1	-0.277791	0.11779	-0.0843152	0.781155	0.0254996	0.921327	0.10055	0.529408	-0.194109	0.34469	-0.208447	0.150795	0.463655	0.00171409	-0.10945	0.478937
ENSSSCG00000005965	MYC	0.782786	0.233184	1.70025	0.0265003	0.976843	0.172661	1.25558	0.0169091	1.00146	0.150971	1.61492	0.00150569	2.3363	1.24e-05	0.765745	0.15797
ENSSSCG00000030957	NFKB1	-2.65247	1.74e-13	-1.89723	1.8e-07	-2.47071	1.45e-11	-2.27256	2.04e-14	-2.56316	1.04e-11	-2.14073	4.43e-14	-2.59413	2.22e-14	-2.13293	1.55e-14
ENSSSCG00000017755	NOS2	-0.332751	0.290596	-0.183711	0.714099	-0.28191	0.449642	-0.652058	0.013009	-0.33521	0.347847	-0.634017	0.0127644	-1.12194	0.000164	-0.269461	0.293561
ENSSSCG00000016450	NOS3	-0.796917	0.0633364	-0.329411	0.621852	-0.803597	0.0990922	-0.702582	0.049762	-0.301435	0.558586	0.50756	0.127568	-0.429167	0.223438	-0.900317	0.0106718
ENSSSCG00000006572	NPR1	-1.48253	0.000513	-1.04644	0.0607169	-1.06927	0.0180877	-1.74266	8.52e-06	-0.403524	0.401952	0.198704	0.576673	-1.62812	2.98e-05	-1.35654	0.000114
ENSSSCG00000005322	NPR2	-0.699931	0.000205	-0.664632	0.00640716	-0.65573	0.00115057	-0.390214	0.0135357	-0.684787	0.000764	-0.784078	2.49e-06	-0.568127	0.000382	-0.72724	5.96e-06
ENSSSCG00000014401	NR3C1	0.725646	0.00499365	0.205084	0.625154	0.601537	0.0336056	0.389197	0.079873	0.416361	0.154731	0.00012	0.999481	0.490626	0.022807	0.841734	0.000106
ENSSSCG00000008841	PDGFRA	-0.182379	0.659607	-0.0233451	0.972289	0.252145	0.574167	0.89674	0.00265282	0.0753126	0.877571	-0.145891	0.650516	1.36151	1.05e-05	0.134048	0.685662
ENSSSCG00000015958	PDK1	-0.508749	0.0902607	-0.764918	0.0566785	-0.428736	0.207915	-0.780083	0.00253897	-0.426367	0.206123	-0.666653	0.00670073	-1.53378	3.06e-07	-0.304124	0.224702
ENSSSCG00000027198	PDK2	0.0465975	0.936748	-0.0796377	0.925373	-0.322388	0.566812	-0.671295	0.0799162	0.0610729	0.922496	0.132867	0.75022	-1.98878	2.06e-06	-0.1694	0.685544
ENSSSCG00000004896	PHLPP1	0.131918	0.535994	0.315426	0.242502	0.445965	0.0315772	-0.0728924	0.689586	0.375001	0.0727721	0.570115	0.000316	0.250514	0.124042	-0.0103751	0.959219
ENSSSCG00000030413	PIK3CA	0.527875	0.00255486	0.352683	0.15165	0.605724	0.00149231	0.516828	0.00076	0.812081	3.21e-05	0.82894	2.49e-07	0.59373	0.000129	0.620557	3.29e-05
ENSSSCG00000027272	PIK3CG	0.0791141	0.919718	-0.167707	0.887716	0.860789	0.194901	1.55311	0.000998	1.00691	0.106818	1.50424	0.00108739	2.56352	2.28e-07	0.24634	0.667402
ENSSSCG00000021964	PIK3R1	-3.51008	2.39e-13	-2.4682	1.35e-07	-2.3972	2.07e-09	-3.32568	3.19e-15	-2.81111	1.91e-10	-2.78167	6.94e-14	-3.43848	3.24e-14	-2.57204	1.3e-13
ENSSSCG00000003914	PRDX1	-1.27943	0.0092677	-1.05939	0.116469	-0.799266	0.149793	-0.0703332	0.887479	-1.30962	0.0153609	-1.33118	0.00133901	1.18841	0.00554374	-0.950336	0.0182802
ENSSSCG00000010682	PRDX3	-0.44801	0.00603393	-0.221197	0.363291	-0.244404	0.190208	-0.505707	0.000486	-0.682568	0.000146	-0.469686	0.000641	-0.843909	5.59e-08	-0.214454	0.114287
ENSSSCG00000022742	PRDX6	-1.06882	1.55e-09	-1.28022	6.96e-09	-1.08002	4.39e-09	-1.40339	1.65e-14	-1.33116	3.46e-11	-1.09694	1.25e-11	-1.3309	9.72e-14	-1.09311	4.36e-12
ENSSSCG00000016858	PRKAA1	-1.3878	1.28e-08	-1.49459	2.05e-06	-1.41391	8.73e-08	-1.31441	7.23e-10	-1.385	1.48e-07	-1.17014	5.43e-09	-1.55821	1.7e-10	-1.15965	3.06e-09
ENSSSCG00000009840	PRKAB1	-0.580274	8.32e-05	-0.394774	0.0394184	-0.464871	0.00302218	-0.461017	0.00025	-0.447478	0.00411804	-0.167301	0.15208	-0.274259	0.021109	-0.45572	0.000141
ENSSSCG00000016200	PRKAG3	-0.830057	0.0551708	-1.01457	0.102431	-1.64494	0.00212161	-1.79849	2.83e-05	-1.24491	0.0131325	-2.12806	1.91e-06	-4.12973	4.97e-09	-0.940784	0.00846944
ENSSSCG00000017268	PRKCA	2.10958	2.22e-06	2.197	4.21e-05	2.34875	7.24e-07	1.9275	2.09e-06	2.33142	9.2e-07	2.13476	1.39e-07	1.14223	0.00466898	2.58558	5.79e-10
ENSSSCG00000010440	PTEN	0.799627	2.86e-06	0.613512	0.00384572	0.960079	2.79e-07	1.03994	4.63e-10	0.875421	2.53e-06	0.800417	1.1e-07	1.10187	1.7e-10	1.01205	1.83e-10
ENSSSCG00000029774	RNF7	-0.138388	0.557423	-0.444608	0.121198	-0.440534	0.0530849	-0.595264	0.00114953	-0.375094	0.108306	-0.460342	0.00771992	-1.22865	5.67e-09	-0.297936	0.0832802
ENSSSCG00000012910	RPS6KB2	-0.273254	0.111701	0.0184987	0.953629	-0.418037	0.027815	-0.518795	0.000554	-0.21357	0.27468	-0.129459	0.363543	-0.562243	0.000261	-0.413823	0.0032475
ENSSSCG00000021208	SEPP1	-0.867944	0.000961	-0.795601	0.020498	-0.326834	0.291136	-0.21655	0.363607	-0.76125	0.00740533	-0.474378	0.0297689	0.858202	0.000298	-0.479733	0.0256551
ENSSSCG00000007804	SH2B1	0.134848	0.455717	-0.127956	0.636278	-0.302531	0.110548	-0.295316	0.0388913	-0.0486063	0.82887	-0.266124	0.053724	-0.427688	0.00297449	-0.0239106	0.885421
ENSSSCG00000001880	SIN3A	0.244937	0.291862	0.374559	0.233908	0.320711	0.205419	0.267601	0.160771	0.57589	0.0178368	0.981515	1.3e-06	0.443203	0.0151914	0.106077	0.598283
ENSSSCG00000009040	SMAD1	-0.0291082	0.893009	-0.542717	0.0280078	-0.224321	0.289208	-0.422643	0.00580601	-0.731311	0.000438	-0.369686	0.0120111	-0.557641	0.000579	-0.148007	0.328818
ENSSSCG00000004505	SMAD2	-0.670311	0.00495854	-1.16144	0.000775	-0.474329	0.0747935	-0.359451	0.065303	-0.571517	0.0290347	-0.688156	0.000595	-0.142451	0.471377	-0.5867	0.00254423
ENSSSCG00000004952	SMAD2	0.602758	0.0109314	0.41202	0.218613	0.567569	0.027457	0.458285	0.0240025	0.419092	0.112923	0.209333	0.289935	0.301127	0.118827	0.511197	0.00775607
ENSSSCG00000014319	SMAD5	-2.3601	1.31e-18	-2.47756	1.02e-14	-2.34913	4.42e-17	-2.35434	4.92e-21	-2.46507	2.46e-17	-2.21359	1.51e-20	-2.23915	3.63e-19	-2.14635	1.05e-20
ENSSSCG00000021355	SOD1	-0.553012	0.000601	-0.441614	0.0379645	-0.463241	0.00681675	-0.628122	1.75e-05	-0.693806	8.8e-05	-0.577926	3.08e-05	-0.63641	7.76e-06	-0.443608	0.000737
ENSSSCG00000028814	SOD3	-2.40328	3.07e-05	-2.79948	0.000548	-2.6391	6.45e-05	-1.36925	0.000979	-2.15579	0.000374	-1.95932	1.42e-05	-1.21793	0.00330522	-2.77193	7.68e-08
ENSSSCG00000013237	SPI1	0.510264	0.300806	0.621289	0.36671	0.52999	0.346592	1.35114	0.000805	0.140647	0.82887	0.694475	0.0722741	2.40559	8.2e-08	0.121633	0.795146
ENSSSCG00000027918	STAT1	-3.8016	9.92e-08	-2.09788	0.00240391	-1.5597	0.00318073	-1.85393	1.84e-05	-3.13931	5.97e-06	-2.70128	6.52e-08	-2.48357	1.22e-06	-1.68687	2.45e-05
ENSSSCG00000000396	STAT2	-0.916426	0.0265911	-0.444364	0.475132	0.380112	0.421534	0.55369	0.0977013	-0.320894	0.513847	-0.117058	0.745265	0.791965	0.0139621	0.269464	0.432699
ENSSSCG00000017403	STAT3	-0.0322651	0.933516	0.371505	0.415994	0.382124	0.279179	0.785607	0.00325334	0.397144	0.255509	0.581791	0.020173	1.25402	6.81e-06	0.246006	0.342033
ENSSSCG00000017402	STAT5A	-1.43334	1.17e-11	-1.1503	9.99e-07	-1.13394	2.21e-08	-1.20241	2.86e-11	-1.55124	2.34e-11	-1.68091	1.3e-15	-0.926619	2.7e-08	-1.14406	2.16e-11
ENSSSCG00000013429	STK11	-0.675944	0.000347	-0.430332	0.0904691	-0.425154	0.0363913	-0.740135	1.52e-05	-0.574449	0.00457221	-0.8741	3.36e-07	-1.03042	2.61e-08	-0.51828	0.000755
ENSSSCG00000005503	TLR4	-1.89044	0.0103411	-1.60152	0.114029	-0.828775	0.289475	0.0405684	0.943022	-1.451	0.066651	-1.13121	0.0376673	1.78155	7.19e-05	-1.81127	0.00213286
ENSSSCG00000005453	TXN	-0.791192	0.0684064	-0.750756	0.219753	-0.569434	0.254728	0.296983	0.44048	-1.08982	0.0231649	-1.24866	0.000731	1.24988	0.00075	-0.631211	0.0739447
ENSSSCG00000006371	USF1	-0.681909	0.000799	-0.660436	0.0136818	-0.33791	0.134243	-0.225323	0.186247	-0.488149	0.0260942	-0.511118	0.00211439	0.183286	0.263399	-0.441142	0.00689591
ENSSSCG00000004826	VIMP	0.743908	0.00793842	0.95969	0.00843887	0.521575	0.107804	0.947094	0.00015	0.527921	0.0977518	1.0962	9.28e-06	1.43456	1.08e-07	0.43237	0.0713554
Oppostitely regulated genes (First window)_Figure 4A
Ensembl ID	Gene Name	MI_infarcted_3h-logFC	MI_infarcted_3h-P.Val	IPOSTC_infarcted_3h-logFC	IPOSTC_infarcted_3h-P.Val	MI_infarcted_3d-logFC	MI_infarcted_3d-P.Val	IPOSTC_infarcted_3d-logFC	IPOSTC_infarcted_3d-P.Val	MI_remote_3h-logFC	MI_remote_3h-P.Val	IPOSTC_remote_3h-logFC	IPOSTC_remote_3h-P.Val	MI_remote_3d-logFC	MI_remote_3d-P.Val	IPOSTC_remote_3d-logFC	IPOSTC_remote_3d-P.Val
ENSSSCG00000010032	PISD	-0.464008	0.0191595	0.508644	0.0356966	-0.0559157	0.83981	-0.0670289	0.706847	-0.422313	0.0557946	0.113901	0.484179	0.133915	0.41207	-0.124016	0.468623
ENSSSCG00000017983	DIS3L	-1.08834	0.0138303	0.306383	0.693767	-0.31604	0.581864	-0.857533	0.0262995	0.566771	0.306184	0.966749	0.0143922	0.223066	0.568619	-0.656959	0.0753118
ENSSSCG00000003875	TTC39A	-1.73532	0.0198034	-0.212954	0.852155	-0.0273106	0.978597	0.20332	0.715815	-0.41642	0.609211	1.41906	0.00153243	-0.0217938	0.969324	-0.649719	0.242607
ENSSSCG00000001421	ZBTB12	1.0588	0.004136	-0.449619	0.523679	0.170957	0.762544	0.167513	0.656184	0.443552	0.341615	-1.25254	0.0016925	-0.167843	0.658247	0.429705	0.205939
ENSSSCG00000004941	DIS3L	0.368872	0.00858138	-0.309695	0.139684	-0.16074	0.369304	-0.338698	0.00767365	-0.0306183	0.878708	-0.34733	0.00494017	-0.442364	0.000881	-0.0630082	0.640432
ENSSSCG00000029353	ZSCAN2	0.955887	0.0112121	0.121409	0.874329	0.53883	0.253233	0.368587	0.296572	0.621261	0.163132	-0.882355	0.0203377	0.482864	0.162154	0.762947	0.0191224
ENSSSCG00000022797	PPP1R3B	1.25614	0.0116263	0.975301	0.162489	1.15558	0.0350032	0.455146	0.311051	0.62479	0.289529	-1.28355	0.00887869	-0.316739	0.5042	1.52277	0.000283
ENSSSCG00000004625	LEO1	0.709792	0.0123983	0.0350351	0.950566	0.160195	0.683514	0.053423	0.852158	0.11308	0.774488	-0.51085	0.0463197	-0.0584364	0.830892	0.243449	0.338955
ENSSSCG00000029533	SEMA4G	0.575772	0.0265268	-4.61e-05	0.999874	-0.109723	0.781874	-0.179386	0.477898	-0.141886	0.703802	-0.476311	0.0484991	0.246822	0.294569	0.0366739	0.896264
ENSSSCG00000003527	EPHB2	1.47033	0.0277318	-0.968011	0.497876	0.247844	0.823339	0.23686	0.744206	-1.0557	0.3203	-1.54236	0.0435443	0.838746	0.177767	0.626054	0.33379
ENSSSCG00000027478	PPCDC	0.665068	0.0308417	0.358629	0.468176	0.185353	0.671873	0.229926	0.424191	0.334487	0.382289	-0.711092	0.0165668	0.436369	0.10978	0.518182	0.0487868
ENSSSCG00000027223	THAP1	0.551925	0.0421626	-0.269762	0.577986	0.272708	0.434719	0.206404	0.408075	0.144289	0.699305	-0.619789	0.015225	0.426379	0.0722973	0.223217	0.368882
ENSSSCG00000005083	DHRS7	0.430198	0.0439662	-0.264735	0.425278	0.0404383	0.898829	-0.0841244	0.67646	0.0209648	0.943793	-0.353475	0.0499182	-0.437863	0.0187183	0.0420921	0.842771
ENSSSCG00000024555	ING2	0.352314	0.0470011	0.0396233	0.909581	-0.230989	0.315109	0.243405	0.111074	-0.0669261	0.788239	-0.407979	0.0102377	0.090348	0.577048	0.174202	0.262482
Oppostitely regulated genes (Second window)_Figure 4B
Ensembl ID	Gene Name	MI_infarcted_3h-logFC	MI_infarcted_3h-P.Val	IPOSTC_infarcted_3h-logFC	IPOSTC_infarcted_3h-P.Val	MI_infarcted_3d-logFC	MI_infarcted_3d-P.Val	IPOSTC_infarcted_3d-logFC	IPOSTC_infarcted_3d-P.Val	MI_remote_3h-logFC	MI_remote_3h-P.Val	IPOSTC_remote_3h-logFC	IPOSTC_remote_3h-P.Val	MI_remote_3d-logFC	MI_remote_3d-P.Val	IPOSTC_remote_3d-logFC	IPOSTC_remote_3d-P.Val
ENSSSCG00000023121	ABCA7	-1.30872	0.00596712	-1.05547	0.104952	-0.639484	0.220883	0.144307	0.70686	-1.00655	0.0503815	-1.80022	3.35e-05	0.903341	0.00662027	-0.95386	0.0104773	ECM-proteinases
ENSSSCG00000004578	ANXA2	-1.26323	0.022246	-1.17108	0.122492	-0.769255	0.233269	0.477735	0.364514	-1.09426	0.0756047	-1.30569	0.0047023	1.84653	0.000478	-1.14614	0.0118033
ENSSSCG00000007625	ARPC1B	-1.7394	0.00343055	-1.24416	0.112468	-0.655905	0.302295	0.457706	0.296545	-1.51486	0.0182879	-1.5986	0.000939	1.84815	3.56e-05	-1.09135	0.0150497
ENSSSCG00000015340	ASNS	-0.629174	0.161739	-0.575243	0.383078	-0.382513	0.474825	-0.577625	0.117526	-0.858469	0.0901103	-0.760182	0.0364432	1.24807	0.000284	-0.94685	0.0103632
ENSSSCG00000012766	BGN	-2.11318	0.00618909	-2.13308	0.0368938	-1.35997	0.120334	0.552469	0.471273	-1.46667	0.0915099	-2.22877	0.000715	1.9279	0.00857665	-1.66747	0.00944399
ENSSSCG00000009658	BNIP3L	-0.652871	0.00409375	-0.954672	0.00159925	-0.421132	0.0968406	-0.170019	0.403474	-0.678522	0.0062679	-0.193818	0.313823	0.47671	0.0121065	-0.648707	0.000593
ENSSSCG00000029411	CAPN2	-0.403061	0.0221091	-0.353537	0.148502	-0.360595	0.0618738	-0.0599087	0.725077	-0.140679	0.521513	-0.42496	0.00374766	0.446831	0.00302645	-0.50623	0.000494
ENSSSCG00000016634	CAV1	-0.880183	5.94e-07	-1.23722	6.46e-08	-0.772965	1.75e-05	-0.674457	9.5e-06	-0.903996	1.7e-06	-1.18974	6.33e-12	-0.453702	0.00105371	-0.81247	4.84e-08
ENSSSCG00000016635	CAV2	-0.370875	0.115096	-0.624419	0.0401897	-0.192469	0.498647	-0.194142	0.347169	-0.526797	0.0359383	-0.54695	0.00413678	-0.449823	0.0168125	-0.124219	0.551504
ENSSSCG00000026752	CCND3	-0.551897	0.0334767	-0.589933	0.102574	-0.431077	0.146083	-0.116152	0.616817	-0.32045	0.28154	-0.15741	0.471807	0.681802	0.00117007	-0.69356	0.0013873
ENSSSCG00000015405	CD36	-0.257972	0.554749	-1.02904	0.0409424	-0.539929	0.221058	-0.522091	0.119003	-0.344539	0.466867	-0.309233	0.350937	-1.61626	1.9e-06	-0.371795	0.256549
ENSSSCG00000009378	CKAP2	-1.45105	0.0527654	-2.49044	0.0395832	-1.11143	0.19058	0.109324	0.853508	-0.551481	0.504527	-1.941	0.00279654	1.49526	0.0016785	-1.40903	0.0184329
ENSSSCG00000016034	COL3A1	-1.55828	0.0310677	-1.97303	0.037079	-0.95323	0.262008	0.395945	0.570402	-1.18103	0.150304	-2.23756	0.00024	2.33378	0.000523	-1.23795	0.0377533
ENSSSCG00000005751	COL5A1	-1.38972	0.0304245	-1.62999	0.0529469	-1.01097	0.167922	0.176871	0.788135	-0.853305	0.25668	-1.66539	0.00186867	1.72567	0.0039162	-1.31738	0.0125706
ENSSSCG00000013667	COL5A3	-0.716643	0.0539721	-0.821846	0.101162	-0.520241	0.221258	-0.082453	0.822267	-0.491479	0.25065	-0.99323	0.00128378	0.847309	0.00835964	-0.60907	0.0445194
ENSSSCG00000029691	CORO1A	-1.47705	0.00573066	-1.03621	0.15106	-0.638567	0.269274	-0.0161961	0.969748	-1.16326	0.0428913	-2.00344	3.64e-05	1.10341	0.00150855	-0.915016	0.0227422
ENSSSCG00000016618	CPED1	0.983626	0.00498078	1.01052	0.0299158	0.790689	0.0404129	0.659486	0.0289487	0.897461	0.01921	1.60612	6.85e-07	-0.639305	0.0477986	0.922258	0.00146955
ENSSSCG00000007306	CPNE1	-0.837312	0.000726	-0.279586	0.438232	-0.291179	0.301061	0.119991	0.570709	-0.347288	0.199334	-0.396583	0.0422008	0.757699	0.00015	-0.437044	0.024861
ENSSSCG00000005641	DNM1	-0.870112	0.0336757	-1.27838	0.0319683	-0.583263	0.214251	-0.0173155	0.961699	-0.590128	0.196294	-0.859916	0.0101607	1.07614	0.000341	-0.77258	0.0192052
ENSSSCG00000008208	EIF2AK3	-0.80663	7.7e-05	-0.302678	0.268078	-0.272237	0.217719	-0.0209169	0.907181	-0.266794	0.214993	-0.212054	0.172662	0.49277	0.00135862	-0.358382	0.0209972
ENSSSCG00000003872	EPS15	-0.496191	0.0249689	-0.687682	0.0180267	-0.304525	0.233792	-0.0405395	0.853569	-0.486033	0.0458665	-0.410359	0.0249492	0.648568	0.000796	-0.426226	0.0183773
ENSSSCG00000009888	ERP29	-0.0542596	0.866843	-0.367363	0.342284	-0.226991	0.480069	-0.20266	0.380837	-0.263409	0.399027	-0.652831	0.00294012	0.499313	0.0201629	-0.563123	0.00907232
ENSSSCG00000024310	F13A1	-2.22359	0.00455893	-2.00552	0.0607169	-2.36094	0.00941329	-0.913878	0.0970626	-2.3627	0.00861126	-1.1915	0.0317384	1.4167	0.00182996	-3.14622	1.87e-05
ENSSSCG00000001818	FES	-1.05703	0.0154794	-0.940325	0.121402	-0.540243	0.282092	0.183442	0.629896	-1.2155	0.0133883	-1.18851	0.00128378	1.23695	0.000451	-0.889385	0.0119512
ENSSSCG00000009403	ITM2B	-0.478222	0.0162509	-0.681987	0.0084102	-0.302953	0.182342	-0.078027	0.683368	-0.491746	0.0239484	-0.521854	0.00172807	0.710088	8.47e-05	-0.394096	0.0153938
ENSSSCG00000016267	ITM2C	-0.813634	0.00825673	-1.29276	0.0015318	-0.438757	0.217593	-0.0891971	0.767176	-1.20585	0.000418	-0.549816	0.0316007	0.560682	0.0320817	-0.718163	0.00463179
ENSSSCG00000003132	KDELR1	-0.170057	0.574342	-0.429545	0.266125	-0.374009	0.228575	-0.00862049	0.974519	-0.166745	0.626325	-0.172687	0.458209	0.728515	0.00159123	-0.499073	0.0234451
ENSSSCG00000022879	KDELR2	-0.649521	0.0356436	-0.330806	0.479352	-0.45643	0.201183	0.141012	0.590225	-0.771393	0.0268566	-0.724733	0.00485384	0.839575	0.000484	-0.609854	0.0156093
ENSSSCG00000015444	LAMB1	-0.723748	0.0159883	-0.869961	0.027513	-0.275978	0.456348	0.269448	0.332224	-0.36575	0.303681	-0.43994	0.0812864	0.897552	0.000866	-0.678004	0.00588155
ENSSSCG00000000125	LGALS1	-1.19002	0.0541594	-1.57034	0.0528035	-1.05737	0.12443	-0.0859643	0.892921	-1.08682	0.114111	-1.36512	0.00737172	1.20768	0.0274266	-1.42224	0.00474741
ENSSSCG00000030378	LIMK1	-0.144851	0.55467	-0.245729	0.480171	-0.493398	0.0572958	0.0597245	0.769693	-0.572829	0.025478	-0.734007	0.00023	0.422014	0.0180209	-0.607883	0.00147426
ENSSSCG00000012318	MAGED1	-0.505249	0.0982988	-0.505854	0.236406	-0.358335	0.312056	0.205536	0.457509	-0.521464	0.121982	-0.796146	0.00157112	0.860624	0.00104008	-0.493515	0.0452858
ENSSSCG00000012342	MAGED2	-0.970423	0.00248197	-1.04546	0.0130234	-0.607872	0.0871068	0.0782158	0.803714	-0.950807	0.00632519	-0.989155	0.000284	0.764732	0.00560469	-0.741089	0.00479297
ENSSSCG00000013269	MAPK8IP1	0.0120447	0.981593	-0.729159	0.260142	-0.670469	0.198306	0.302538	0.380548	-0.665736	0.188479	-1.01537	0.00674486	1.22317	0.00016	-0.775411	0.0325442
ENSSSCG00000008695	MFSD10	-0.804454	0.0021249	-0.346463	0.352097	-0.322378	0.278238	0.131164	0.545184	-0.696735	0.0145425	-0.779881	0.000367	0.615168	0.00215346	-0.470397	0.0226163
ENSSSCG00000002039	MMP14	-0.50208	0.284814	-0.943811	0.124066	-0.553521	0.288771	0.195315	0.646295	-0.249003	0.667015	-0.666902	0.070616	1.28862	0.00114841	-0.880235	0.0159597
ENSSSCG00000017300	MRC2	-0.986452	0.0613053	-1.46371	0.0330805	-0.535796	0.398531	0.368656	0.457395	-0.913722	0.119071	-1.44157	0.00100373	1.59008	0.000988	-1.02846	0.0162903
ENSSSCG00000011251	MYD88	-2.33513	1.46e-05	-1.67215	0.00883186	-1.11389	0.0235361	-0.332576	0.336616	-1.79878	0.000786	-1.62363	4.27e-05	0.701504	0.0238732	-1.64376	2.62e-05
ENSSSCG00000000209	NCKAP5L	-0.51854	0.048009	-0.268539	0.505035	-0.291606	0.34838	-0.0895002	0.708529	-0.240187	0.440015	-0.348906	0.102689	0.466409	0.0251069	-0.43108	0.0434561
ENSSSCG00000003768	NEXN	1.60842	2.23e-05	0.824342	0.0871793	0.262459	0.536906	0.61306	0.0405041	1.66566	5.29e-05	1.56329	1.45e-06	-0.602648	0.025402	0.364639	0.203059
ENSSSCG00000010627	PDCD4	-0.678024	0.024614	-1.05033	0.0103247	-0.242364	0.515019	0.200315	0.458084	-0.340175	0.334498	-0.223304	0.38214	0.998174	0.000148	-0.594752	0.0160479
ENSSSCG00000017277	PECAM1	-0.18023	0.515104	-0.132065	0.758761	-0.180033	0.564802	-0.0981289	0.67775	0.0642392	0.851627	0.108666	0.629963	0.845089	0.000152	-0.480838	0.0166946
ENSSSCG00000017912	PLD2	-0.400687	0.151704	-0.567953	0.150998	-0.663152	0.0372645	0.112832	0.634941	-0.334511	0.2924	-0.70561	0.00254281	0.585872	0.00605371	-0.640682	0.00538561
ENSSSCG00000028879	PLOD3	-0.740405	0.00492958	-0.365915	0.337747	-0.52377	0.073017	-0.0532975	0.827952	-0.692512	0.0166802	-0.402967	0.0583894	0.723727	0.000755	-0.68413	0.00157667
ENSSSCG00000021296	PTTG1IP	-0.517229	0.00322993	-0.266888	0.295931	-0.280047	0.158326	-0.117195	0.464111	-0.356163	0.0675056	-0.217157	0.138965	0.427542	0.00411297	-0.422257	0.00328471
ENSSSCG00000006564	RAB13	-0.237852	0.541607	-1.05029	0.0451952	-0.690627	0.102085	-0.193824	0.538295	-0.00592716	0.99102	-0.240536	0.424485	0.75081	0.00731188	-1.2311	0.000149
ENSSSCG00000013623	RAB3D	-0.204417	0.483385	-0.548132	0.162885	-0.115166	0.752074	0.199579	0.372901	-0.127409	0.714459	-0.3642	0.103513	1.05275	3.12e-06	-0.559317	0.0136838
ENSSSCG00000007806	RABEP2	-0.453107	0.0782268	-0.8851	0.0151993	-0.358025	0.231614	-0.210184	0.329412	-0.497909	0.0842923	-0.459382	0.0280133	0.469916	0.0179593	-0.594178	0.00509174
ENSSSCG00000028968	RAC1	-0.848736	4.15e-05	-0.592666	0.0261773	-0.523326	0.0161495	-0.289316	0.100666	-0.644162	0.00328433	-0.49831	0.00310961	0.450265	0.00888247	-0.551449	0.000892
ENSSSCG00000025455	RALB	-0.279277	0.275277	-0.574267	0.0810948	-0.189369	0.53253	-0.0606896	0.796554	-0.322723	0.248216	-0.447711	0.0252655	0.665482	0.00148626	-0.45725	0.0210723
ENSSSCG00000026646	RFFL	-0.401007	0.279009	-0.593381	0.261594	-0.416891	0.333908	-0.258388	0.394898	-0.801753	0.0536162	-0.703433	0.0186894	0.95195	0.000507	-0.701417	0.018547
ENSSSCG00000024974	RPL13	-0.567298	0.0699841	-0.225459	0.65969	-0.577535	0.091032	-0.110612	0.713146	-0.528552	0.128607	-0.724158	0.00472164	0.733864	0.0062188	-0.539372	0.0326745
ENSSSCG00000017509	RPL19	-0.501243	0.106384	-0.304896	0.524556	-0.436792	0.20973	-0.12931	0.656014	-0.633864	0.0579349	-0.582075	0.0204786	0.71396	0.00671442	-0.57255	0.0206916
ENSSSCG00000000089	RPL3	-0.707573	0.136696	-0.316195	0.684351	-0.587097	0.278339	0.39205	0.364894	-0.488218	0.380273	-0.766907	0.0454407	1.69012	0.000122	-0.829839	0.027855
ENSSSCG00000027637	RPL32	-0.649486	0.0332956	-0.331755	0.485197	-0.51883	0.129231	-0.0709382	0.814122	-0.655153	0.0505489	-0.712893	0.00483981	0.752108	0.00467062	-0.553801	0.0261218
ENSSSCG00000029830	RPL8	-0.401434	0.179748	-0.196131	0.684388	-0.406282	0.219051	-0.125894	0.646593	-0.425631	0.19614	-0.535791	0.0243252	0.725074	0.00379937	-0.469904	0.0461125
ENSSSCG00000001502	RPS18	-0.582126	0.117514	-0.374191	0.511412	-0.617718	0.128372	-0.256169	0.44204	-0.644911	0.112375	-0.779552	0.00935946	0.975213	0.0024328	-0.702678	0.0174983
ENSSSCG00000015103	RPS25	-0.253971	0.455141	-0.159815	0.766405	-0.516308	0.132994	-0.0792287	0.792129	-0.296854	0.42579	-0.236875	0.371831	0.684372	0.00956615	-0.531621	0.0336919
ENSSSCG00000006558	RPS27	-0.0287621	0.9433	-0.336218	0.485835	-0.518877	0.136731	-0.0972513	0.747774	-0.163201	0.690451	-0.343633	0.189266	0.71777	0.00728915	-0.672627	0.00786772
ENSSSCG00000022357	RPS27A	-0.195441	0.53189	-0.172546	0.713452	-0.376866	0.238499	-0.0695835	0.798241	-0.372223	0.244373	-0.31304	0.180166	0.650384	0.00649734	-0.451518	0.0462705
ENSSSCG00000004022	RPS6KA2	-0.215359	0.664629	-0.20947	0.783331	-0.106406	0.865168	0.299747	0.408982	-0.113934	0.845192	-0.585915	0.115927	1.56977	7.39e-06	-0.787428	0.037813
ENSSSCG00000003930	RPS8	0.0027947	0.995441	-0.0832765	0.897061	-0.505602	0.188887	0.181337	0.573986	-0.110174	0.811938	-0.262482	0.370013	0.959387	0.00140114	-0.569962	0.0391299
ENSSSCG00000006612	S100A10	-0.438305	0.371889	-0.967075	0.136826	-0.684304	0.19943	0.264648	0.529675	-0.685423	0.193069	-1.21543	0.00200354	1.30283	0.00110656	-0.827654	0.0294125
ENSSSCG00000021084	S100A6	-2.43329	0.0189287	-2.76698	0.0737996	-1.45474	0.180355	0.244252	0.724844	-2.17598	0.0556592	-3.03936	0.000859	1.95203	0.000543	-2.33537	0.00422018
ENSSSCG00000001887	SCAMP5	-0.510279	0.142791	-0.694185	0.164484	-0.52346	0.193544	-0.279283	0.333151	-0.908809	0.0222764	-1.01378	0.00077	0.514912	0.0492177	-0.773869	0.00704654
ENSSSCG00000003332	SDF4	-0.564492	0.00585481	-0.326573	0.268259	-0.288858	0.221528	-0.0588291	0.767122	-0.551627	0.0138093	-0.477516	0.00510386	0.412636	0.0163584	-0.4493	0.00750376
ENSSSCG00000025363	SNX17	-0.709614	0.00143878	-0.409074	0.184321	-0.474086	0.0508703	-0.0660371	0.750377	-0.870455	0.000433	-0.672211	0.000333	0.444887	0.0136848	-0.57211	0.00162241
ENSSSCG00000004012	THBS2	-1.68856	0.0107239	-1.8947	0.0356506	-1.24638	0.0882923	0.718997	0.227693	-1.46153	0.0437196	-1.50646	0.00596292	1.84159	0.00185322	-1.42477	0.00848699
ENSSSCG00000029652	TMBIM6	-0.649639	0.0122576	-0.729942	0.0332749	-0.367144	0.221081	-0.160435	0.506964	-0.769357	0.00621363	-0.667118	0.00212177	0.693303	0.00233703	-0.520383	0.0144044
ENSSSCG00000021010	TMEM219	-0.563311	0.0437255	-0.450094	0.262473	-0.330632	0.315109	-0.160081	0.500935	-0.696452	0.0268605	-0.708823	0.00247919	0.464863	0.0298535	-0.519999	0.0219822
ENSSSCG00000013360	TMEM86A	-1.15765	0.0874342	-1.26301	0.197341	-0.431428	0.588995	0.241835	0.641665	-0.247576	0.756225	0.275684	0.58062	1.13431	0.0112561	-1.08157	0.0430655
Genes involved in Focal adhesion pathway_Figure 5B
Ensembl ID	Gene Name	MI_infarcted_3h-logFC	MI_infarcted_3h-P.Val	IPOSTC_infarcted_3h-logFC	IPOSTC_infarcted_3h-P.Val	MI_infarcted_3d-logFC	MI_infarcted_3d-P.Val	IPOSTC_infarcted_3d-logFC	IPOSTC_infarcted_3d-P.Val	MI_remote_3h-logFC	MI_remote_3h-P.Val	IPOSTC_remote_3h-logFC	IPOSTC_remote_3h-P.Val	MI_remote_3d-logFC	MI_remote_3d-P.Val	IPOSTC_remote_3d-logFC	IPOSTC_remote_3d-P.Val
ENSSSCG00000000024	PARVB	0.784685	0.000244	0.530297	0.0652615	0.52194	0.0265128	0.471799	0.0101056	0.574343	0.0132899	0.555622	0.00185471	-0.172992	0.376506	0.429526	0.015436
ENSSSCG00000000025	PARVG	0.0850135	0.934465	0.217629	0.880359	1.05963	0.207787	2.30504	9.15e-05	0.603302	0.517362	0.0008	0.999215	3.36522	4.93e-08	0.302207	0.683124
ENSSSCG00000000293	ITGA5	0.472313	0.0285732	1.03506	0.00045	0.765208	0.00116668	1.01793	1.07e-06	1.04064	3.44e-05	0.610588	0.000764	1.26086	1.04e-08	0.733637	5.36e-05
ENSSSCG00000000727	CCND2	0.654445	0.15903	1.17761	0.0382241	1.60321	0.000473	1.42536	0.000187	0.355003	0.543006	1.27937	0.000525	0.60108	0.126163	1.79161	2.02e-06
ENSSSCG00000001660	PTK7	-0.481779	0.494702	-0.461477	0.665975	-0.179939	0.842487	1.36215	0.00405696	-0.66838	0.401522	-1.17661	0.0385715	2.46478	9.15e-07	-0.535869	0.334413
ENSSSCG00000003818	DOCK7	1.10205	0.000246	1.39445	0.000197	1.1518	0.000409	1.70672	3.37e-09	1.76447	1.23e-07	1.00198	0.000122	2.10455	2.31e-11	1.15384	1.04e-05
ENSSSCG00000004704	PPIP5K1	0.427388	0.0808547	0.645756	0.0433126	0.487276	0.0717519	0.242085	0.257248	0.351566	0.206146	0.243049	0.240783	-0.391492	0.0800615	0.620389	0.00188396
ENSSSCG00000004789	THBS1	0.958008	0.141178	1.89454	0.0343475	1.61101	0.0231099	2.36775	9.37e-05	2.17462	0.00321204	2.23676	9e-05	4.14431	8.09e-09	1.22503	0.0174184
ENSSSCG00000005317	TLN1	0.0407342	0.937394	0.247505	0.717609	0.169722	0.755757	0.908025	0.0122032	0.275556	0.591126	-0.147483	0.683641	1.90774	1.7e-06	0.170388	0.646539
ENSSSCG00000006785	RAP1A	0.740548	2.61e-05	0.584628	0.00843887	0.39921	0.0275812	0.495035	0.000792	0.683982	0.00026	0.696524	3.55e-06	0.3005	0.0274685	0.42463	0.00182055
ENSSSCG00000007334	SRC	0.115703	0.675889	0.151738	0.706389	0.332235	0.230669	0.781739	0.000138	0.00738713	0.983234	-0.427977	0.0400545	0.415426	0.0373605	0.633899	0.00103597
ENSSSCG00000007585	BETA-ACTIN	-0.435195	0.524572	-0.369742	0.719602	-0.158819	0.856458	0.794871	0.155762	-0.363672	0.644753	-1.09067	0.0280293	2.78605	5.94e-06	-0.41584	0.441432
ENSSSCG00000008358	ACTR2	0.18183	0.689287	0.125267	0.860626	0.489856	0.290646	1.10697	0.00188719	0.194551	0.70485	0.341271	0.304777	2.3413	2.33e-08	0.275959	0.418813
ENSSSCG00000009650	DOCK5	1.77339	1.07e-07	1.96089	1.26e-06	1.75846	5.8e-07	1.83649	3.29e-09	2.01594	2.57e-08	1.43896	6.71e-07	1.71869	3.67e-08	2.01734	8.45e-11
ENSSSCG00000009661	ALPHA-1A	6.66697	2.92e-10	6.12328	1.07e-06	6.62917	1.96e-09	5.32629	6.83e-08	6.41392	7.73e-09	4.72475	1.25e-06	4.11917	5.51e-05	6.99744	1.72e-12
ENSSSCG00000009664	PTK2B	-0.499074	0.33841	-0.571714	0.461472	0.395084	0.478094	0.852196	0.0203148	-0.286906	0.642886	-0.212907	0.613174	1.71372	6.54e-06	0.30388	0.449502
ENSSSCG00000010095	CRKL	-0.288001	0.0121462	-0.216267	0.179899	-0.16382	0.214342	-0.25473	0.0105207	-0.358381	0.00414692	-0.324781	0.000782	-0.137831	0.144296	-0.182605	0.052407
ENSSSCG00000010190	ACTA1	1.47024	0.000135	1.88568	0.000214	0.695171	0.0879577	1.81364	4.83e-07	1.85503	1.9e-05	1.07666	0.000552	1.74346	6.68e-07	1.07903	0.000404
ENSSSCG00000010230	CTNNA3	1.45633	0.0914042	2.57939	0.00766723	1.6733	0.0737058	0.84667	0.287718	2.59114	0.0017042	2.16182	0.00181515	-0.643688	0.478427	2.29633	0.000861
ENSSSCG00000010313	VCL	-0.25882	0.284558	-0.0389367	0.929081	-0.19046	0.499612	0.131035	0.54025	-0.0197169	0.950516	-0.497983	0.00820488	0.0973821	0.619453	-0.0585183	0.791439
ENSSSCG00000011101	ITGB1	-0.314746	0.43853	-0.323484	0.581923	0.18141	0.718744	0.697047	0.0365409	-0.184678	0.705792	-0.645223	0.033371	1.75048	1.74e-06	-0.00911937	0.981527
ENSSSCG00000011274	CTNNB1	-0.392716	0.0382887	-0.111167	0.728344	0.167254	0.478268	0.364191	0.0301332	-0.314633	0.140226	-0.165998	0.303198	0.497053	0.00225132	0.163263	0.32112
ENSSSCG00000012181	PDK3	0.761285	0.00263859	1.23472	0.000113	1.1898	1.54e-05	0.955795	2.62e-05	0.934596	0.000636	0.616537	0.00423831	0.694749	0.00195634	1.25106	4.99e-08
ENSSSCG00000012873	CCND1	0.385896	0.166451	1.107	0.00107192	0.485562	0.1141	0.450775	0.0507237	0.105963	0.776678	0.189819	0.426195	-0.033521	0.89873	0.815563	0.000267
ENSSSCG00000013041	FERMT3	-0.703543	0.480844	-0.352913	0.82053	0.26952	0.817151	2.03599	0.00104482	0.0955357	0.933211	-0.294917	0.705856	3.63065	7.7e-08	-0.230271	0.779688
ENSSSCG00000014267	RAPGEF6	0.222957	0.305396	0.762436	0.00388899	0.581272	0.00861249	0.681316	0.000159	0.634343	0.0039977	0.936009	4.2e-07	0.97891	3.76e-07	0.562393	0.00088
ENSSSCG00000014387	DIAPH1	-0.00953312	0.981656	-0.29524	0.573656	0.258439	0.514808	0.731443	0.00641018	0.203232	0.612871	0.244841	0.364594	1.5502	1.8e-07	0.0934741	0.759714
ENSSSCG00000015375	ITGB8	0.745505	0.0865172	1.77573	0.00037	1.01976	0.0284967	1.26102	0.000516	1.25469	0.00459891	1.3486	0.00015	1.45723	8e-05	1.22388	0.000519
ENSSSCG00000016174	FN1	-0.869761	0.416429	-0.818624	0.599896	0.275618	0.850851	3.04196	0.00218042	-0.0385609	0.978607	-0.899151	0.28167	4.98166	4.3e-06	-0.18585	0.851507
ENSSSCG00000016494	BRAF	0.9745	0.000722	1.07659	0.00353723	0.671488	0.0390286	-0.00422909	0.989458	1.08674	0.000484	1.31561	4.62e-07	-0.433012	0.125794	0.777344	0.00144813
ENSSSCG00000016578	FLNC	0.206296	0.685242	0.814993	0.196997	0.325032	0.556164	0.824157	0.0316651	0.515543	0.321428	0.498576	0.176189	0.723569	0.0463195	0.575671	0.114528
ENSSSCG00000016885	ITGA1	0.836801	0.00054	0.707768	0.0254968	0.615054	0.0178454	0.511576	0.0126553	1.34053	1.97e-06	0.887407	2.15e-05	0.81539	9.48e-05	0.441236	0.0241153
ENSSSCG00000016887	ITGA2	0.785682	0.157861	-0.0433376	0.969552	0.573035	0.403523	1.00542	0.0275364	0.273084	0.718043	-0.127859	0.820775	2.00023	1.23e-05	-0.328934	0.557241
ENSSSCG00000017268	PRKCA	2.10958	2.22e-06	2.197	4.21e-05	2.34875	7.24e-07	1.9275	2.09e-06	2.33142	9.2e-07	2.13476	1.39e-07	1.14223	0.00466898	2.58558	5.79e-10
ENSSSCG00000020703	ACTN1	-0.238579	0.659613	-0.0466071	0.9585	0.15516	0.813801	1.22975	0.0034368	0.0891603	0.89	-0.245435	0.552132	2.43506	2.91e-07	-0.0489148	0.917943
ENSSSCG00000021176	LPXN	0.243689	0.832401	-0.111683	0.953164	1.06112	0.308255	2.58147	0.000188	0.362454	0.771711	-0.896774	0.320975	3.73533	1.52e-07	0.553051	0.507269
ENSSSCG00000023503	PRKCD	0.322956	0.678797	0.170934	0.89381	0.882733	0.24068	2.10865	9.44e-05	0.363797	0.677156	-0.127349	0.850317	3.37384	1.37e-08	0.343845	0.580224
ENSSSCG00000025133	ITGB2	-0.469955	0.545818	-0.333509	0.783331	0.67228	0.382084	1.72274	0.00144821	-0.149435	0.872658	-0.570169	0.340559	3.31348	7.82e-08	-0.0545734	0.935765
ENSSSCG00000025182	ELK4	1.30133	0.0935901	3.46999	1.55e-05	2.72217	0.000226	1.81705	0.00460434	2.23849	0.00306645	2.01393	0.00123655	1.56198	0.0166341	2.93359	2.52e-06
ENSSSCG00000025802	PPIP5K2	1.13518	0.00154039	1.28266	0.00520012	0.988026	0.0127058	1.09414	0.000568	1.83355	3.5e-06	1.68886	2.48e-07	0.37269	0.259735	1.65353	2.55e-07
ENSSSCG00000026301	RAP2C	0.10515	0.666422	0.101232	0.783964	0.296375	0.22511	0.63311	0.000759	-0.0924106	0.742662	-0.203939	0.254942	1.01062	5.06e-07	0.391799	0.0233903
ENSSSCG00000026752	CCND3	-0.551897	0.0334767	-0.589933	0.102574	-0.431077	0.146083	-0.116152	0.616817	-0.32045	0.28154	-0.15741	0.471807	0.681802	0.00117007	-0.69356	0.0013873
ENSSSCG00000027189	PPP1R12C	0.468037	0.0892857	0.886805	0.0145972	0.339943	0.285333	0.221607	0.356013	0.713547	0.016819	0.72485	0.0014572	-0.0574921	0.812475	0.195848	0.408596
ENSSSCG00000028355	BETA-ACTIN	-0.642159	0.247644	-0.147004	0.882251	-0.0812666	0.918447	0.991155	0.0420539	-0.396168	0.552296	-0.878253	0.0436858	2.78679	5.39e-07	-0.295932	0.538465
ENSSSCG00000028878	BCAR1	0.319984	0.178556	0.610059	0.0474269	0.288916	0.291036	0.45625	0.0206965	0.36944	0.15682	0.0118508	0.959323	0.455058	0.0182984	0.440258	0.0198196
